# Supplementary material for: PDGF inhibits BMP2-induced bone healing
Source: PubMed Central journal article supplement (PMC9834334; doi:10.1038/s41536-023-00276-5), 2023-01-11
Supplement: 41536_2023_276_MOESM1_ESM.pdf [file 41536_2023_276_MOESM1_ESM.pdf]

**Supplemental Table 1.** Antibodies used for flow cytometry and western blots.

| Antibodies                                   | Catalog number           | Producer       | Dilution |
|----------------------------------------------|--------------------------|----------------|----------|
| CD45 violet Fluor 450, Clone: 30-F11         | 48-0451-82               | eBioscience    | 1:400    |
| Ter119 eFluor 450, Clone: TER-119            | 48-5921-82               | eBioscience    | 1:400    |
| CD31 eFluor 450, Clone: 390                  | 48-0311-82               | eBioscience    | 1:200    |
| CD140a PE-Cy7 or APC, Clone: APA5            | 25-1401-82 or 17-1401-81 | eBioscience    | 1:400    |
| CD140b APC or eFluor780, Clone: APB5         | 17-1402-82 or 47-1402-82 | eBioscience    | 1:100    |
| Phospho-p44/42 MAPK (Erk1/2) (Thr202/Tyr204) | #9101                    | Cell Signaling | 1:1000   |
| Phospho-Akt (Ser473)                         | #9271                    | Cell Signaling | 1:1000   |
| Anti-rabbit IgG, HRP-linked Antibody         | #7074                    | Cell Signaling | 1:2000   |
| GAPDH                                        | sc-25778                 | Santa Cruz     | 1:1000   |
| p44/42 MAPK (Erk1/2) Antibody                | #9102                    | Cell Signaling | 1:1000   |
| Akt (pan) (40D4) Mouse mAb                   | #2920                    | Cell Signaling | 1:200    |
| Anti-mouse IgG, HRP-linked Antibody          | 12.19.16                 | KPL            | 1:5000   |
| Osterix                                      | ab209484                 | Abcam          | 1:200    |

**Supplemental Table 2.** Primers used for gene analysis and recombination and TaqMan probes

| Gene                        | Forward (5'-3')                 | Reverse (5'-3')                 |
|-----------------------------|---------------------------------|---------------------------------|
| <i>Dlx5</i>                 | GCC CTA CCA CCA GTA CG          | TCA CCA TCC TCA CCT CTG G       |
| <i>Noggin</i>               | CAC TAT CTA CAC ATC CGC CCA G   | AGC GTC TCG TTC AGA TCC TTC T   |
| <i>Id1</i>                  | CTC TAC GAC ATG AAC GGC TGT     | TGC TCA CCT TGC GGT TCT G       |
| <i>Pdgfrb</i>               | AGG ACA ACC GTA CCT TGG GTG ACT | CAG TTC TGA CAC GTA CCG GGT CTC |
| <i>Pdgfrb recombination</i> | GGA AAA GCA GGT TTG TGC         | CCA GTT AGT CCA CTT ATG TTG     |
| <b>TaqMan probes</b>        |                                 |                                 |
| <i>Alp</i>                  |                                 | Mm01187117_m1                   |
| <i>Ibsp</i>                 |                                 | Mm00492555_m1                   |
| <i>Bglap</i>                |                                 | Mm03413826_mH                   |
| <i>Pdgfa</i>                |                                 | Mm00440701_m1                   |
| <i>Gapdh</i>                |                                 | Mm99999915_g1                   |

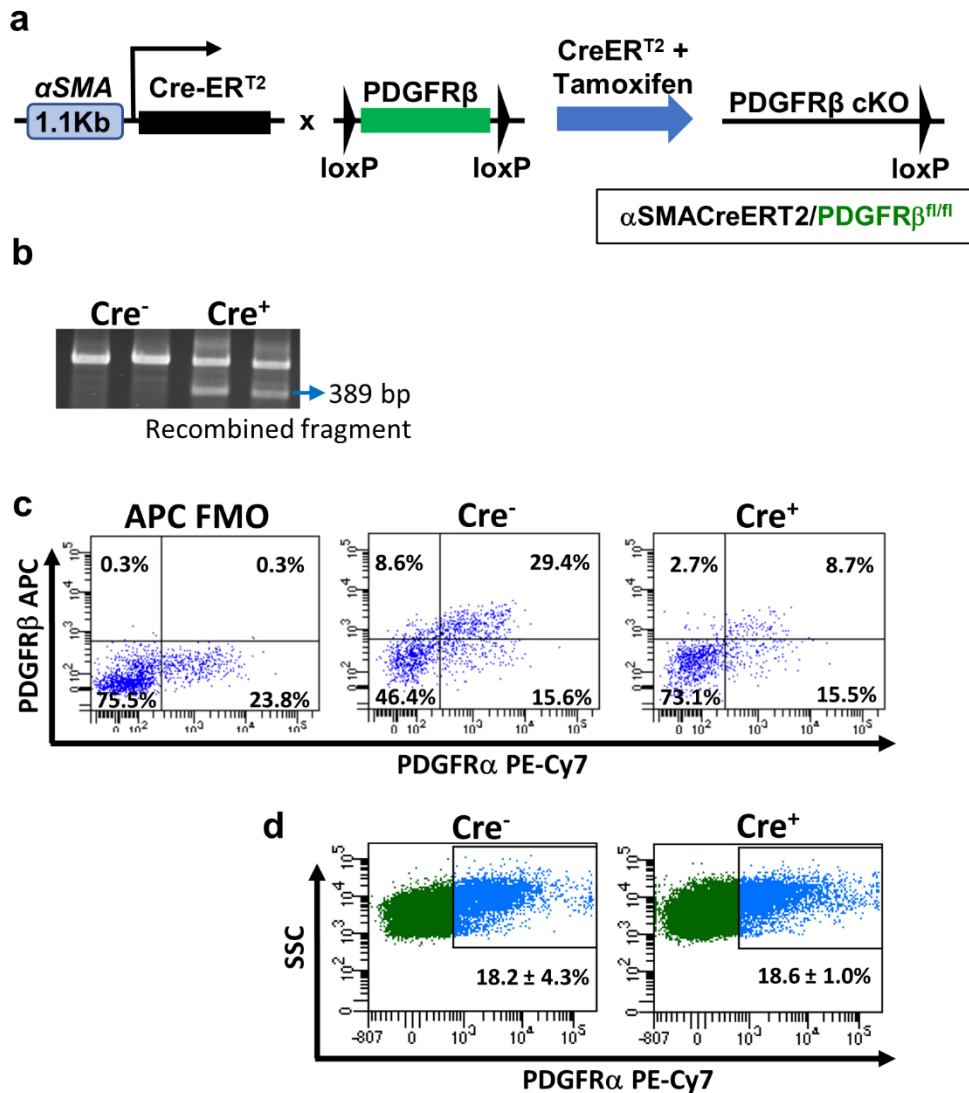

**Supplemental figure 1. PDGFR $\beta$  recombination efficiency.** a.  $\alpha$ SMACreERT2 transgenic mice were crossed with a PDGFR $\beta$  floxed mice to get  $\alpha$ SMACreERT2/PDGFR $\beta^{fl/fl}$  mice where upon tamoxifen-induced Cre recombination PDGFR $\beta$  is deleted in  $\alpha$ SMA cells. b. Cre-induced recombination was validated by DNA recombination in tibia fracture after tamoxifen injection on the day of fracture, 2 and 4 days after in male/female mice. Each lane represents an individual mouse. c. Validation of Cre-induced recombination in fracture of  $\alpha$ SMACreERT2/PDGFR $\beta^{fl/fl}$  mice evaluating protein expression by flow cytometry 11 DPF in female mice. d. PDGFR $\alpha$  cell proportion within (CD45/Ter119/CD31)<sup>-</sup> population is not changed with PDGFR $\beta$  deletion compared to Cre<sup>-</sup> control on 5 DPF, Cre<sup>-</sup> n=3, Cre<sup>+</sup> n=2.

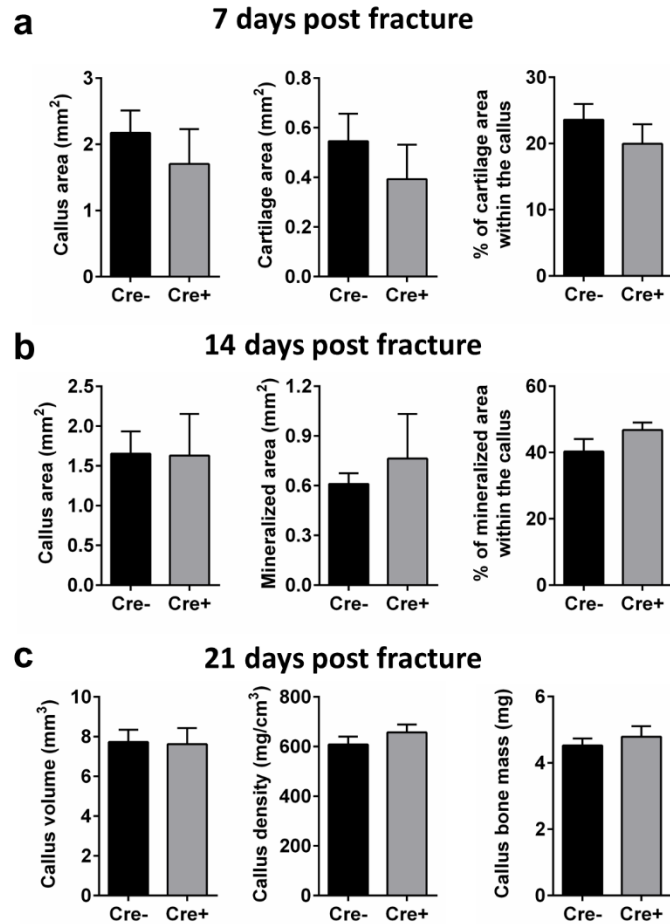

**Supplemental figure 2. Fracture healing in  $\alpha$ SMACreERT2/PDGFR $\beta^{fl/fl}$  female mice.** PDGFR $\beta$  deletion in  $\alpha$ SMA osteoprogenitors was induced injecting tamoxifen on a day of a femur fracture and 2 DPF. a. Callus and cartilage area were determined 7 DPF (n=6), and b. callus, and mineralized area on 14 DPF (n=7). PDGFR $\beta$  deletion in  $\alpha$ SMA osteoprogenitors did not lead to changes in callus volume and bone mass 21 DPF evaluated by  $\mu$ CT (n=11). Values are expressed as mean + s.e.m. Statistical test: an unpaired two-tailed Students t-test.

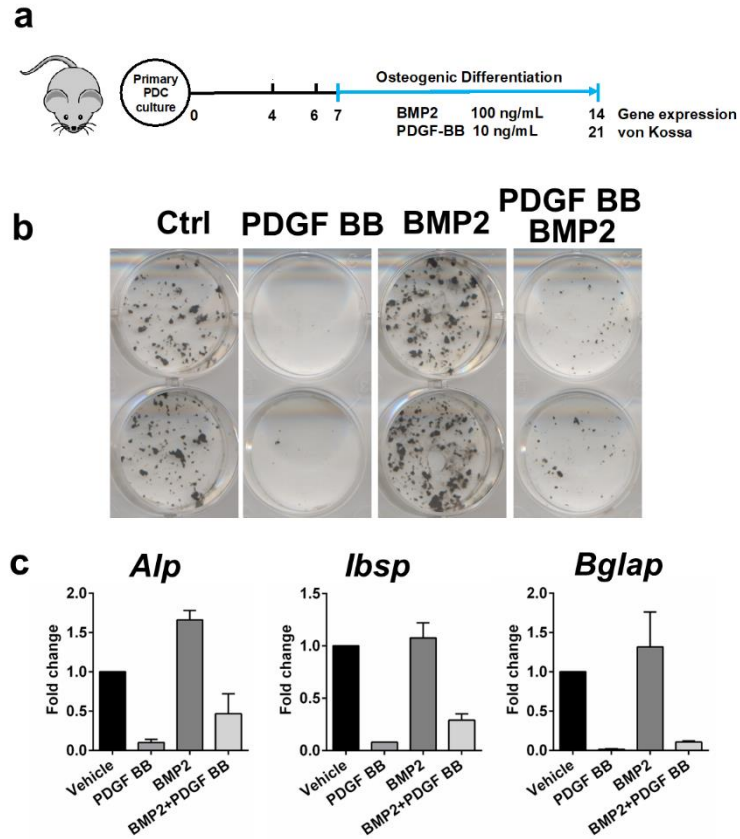

**Supplemental figure 3. Effect of PDGF BB on BMP2 osteogenesis.** a. Experimental design for induction of periosteal cell osteogenesis b. Von Kossa staining of periosteal cell culture on day 21. c. Gene expression analysis of osteogenesis markers (*Alp*, *Ibsp*, *Bglap*) of periosteal cells was performed on day 14. Values are expressed as mean + s.e.m. n=2. Statistical test: One-way ANOVA with Bonferroni's post hoc test.

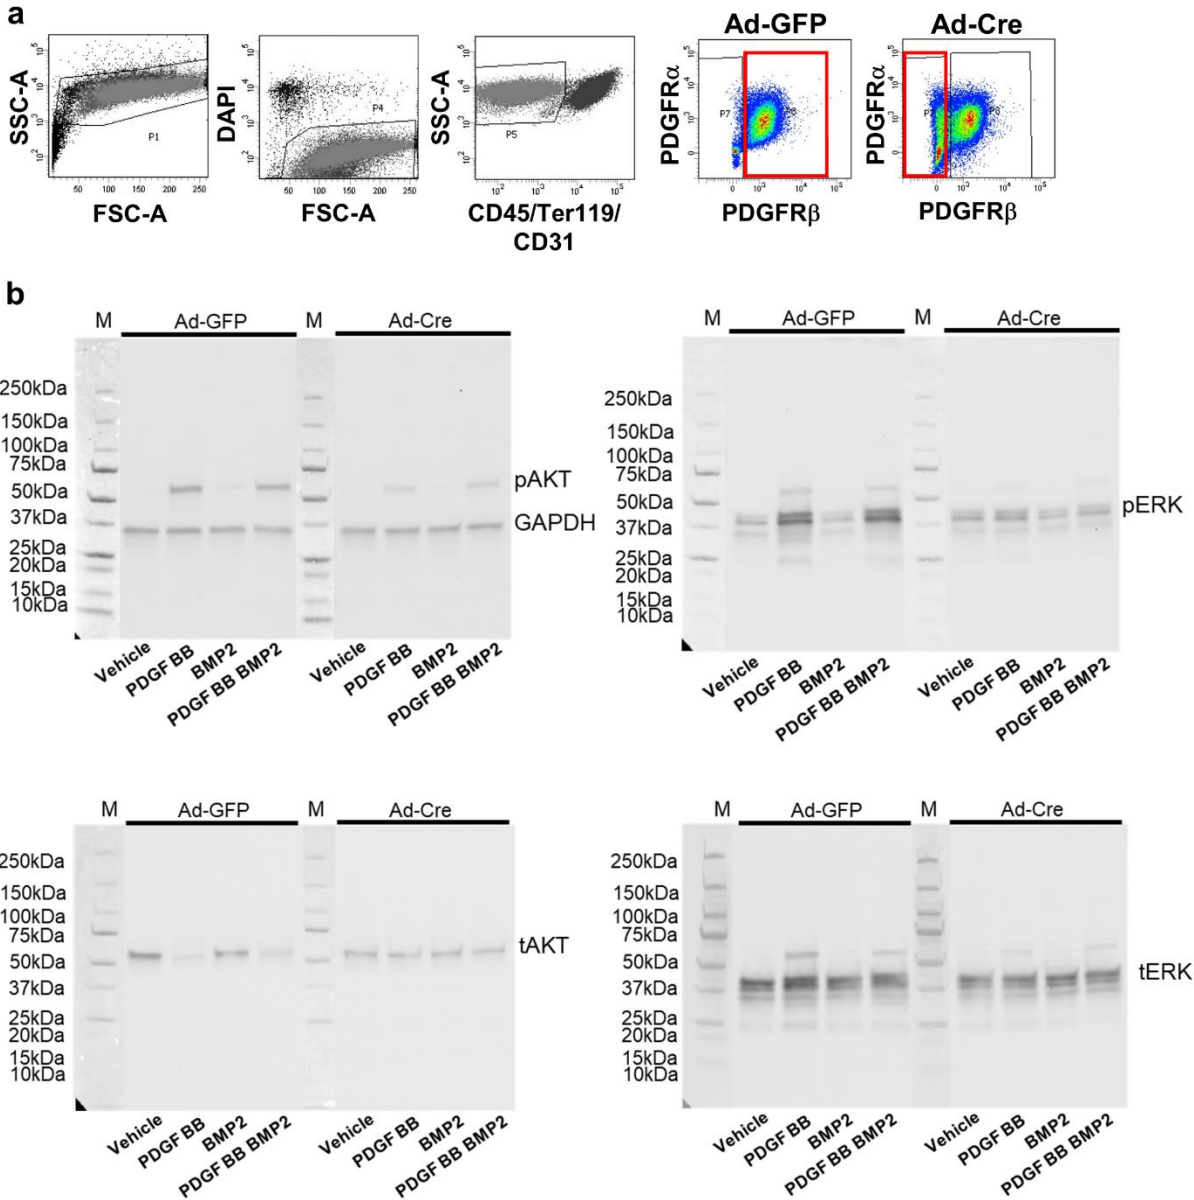

**Supplemental figure 4. Protein analysis for sorted PDGFR $\beta$ <sup>-</sup> and PDGFR $\beta$ <sup>+</sup> cells.** a. A gating strategy for sorting Ad-GFP PDGFR $\beta$ <sup>+</sup> cells and Ad-Cre PDGFR $\beta$ <sup>-</sup> cells after transduction. b. Whole blots after immunoblotting with pAKT, GAPDH, pERK1/2, tAKT and tERK. M – protein ladder. Colorimetric image of a marker is stitched into the original blot to visualize protein size.

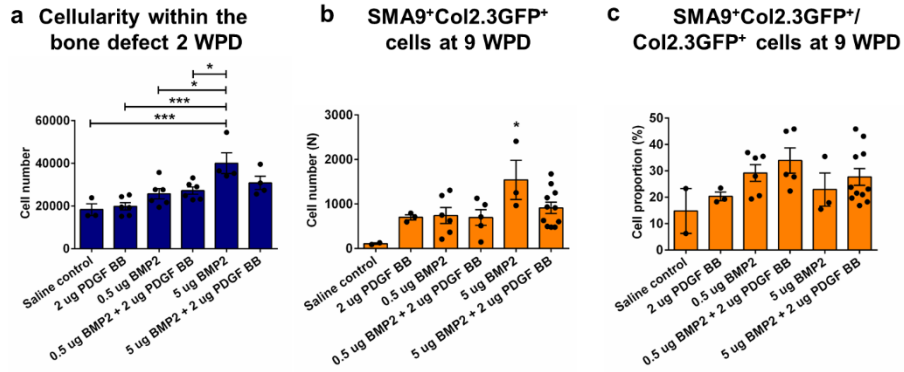

**Supplemental figure 5. Histological analysis of femoral defects.** a. Femoral defects performed on SMA9/Col2.3GFP male mice and total cell number within the defect area were evaluated 2 WPD. Results are expressed as mean + s.e.m. \* $p < 0.05$ , \*\* $p < 0.001$ ,  $n = 3-6$ . b. Histological evaluation of dual expressing SMA9<sup>+</sup>Col2.3GFP<sup>+</sup> cells within defect area and c. proportion of SMA9<sup>+</sup>Col2.3GFP<sup>+</sup> over Col2.3GFP<sup>+</sup> cells 9 WPD surgery. Results are expressed as mean + s.e.m. \* $p < 0.05$  compared to saline control,  $n = 5-10$  (saline control,  $n = 2$ ). Statistical test: One-way ANOVA with Tukey's post hoc test.
